# Supplementary material
Source: PubMed Central journal article supplement (PMC1828933)
Supplement: eukcell_EC.00264-06_1.pdf [file eukcell_EC.00264-06_1.pdf]

**Supplement, Fig. 1.** Strategy for *CMR1* gene deletion and analysis of transformants. **(A)** *CMR1* replacement vector. P<sub>trp</sub>, t<sub>trp</sub>e, t<sub>trp</sub>, s, a, ctrl-s, V-a, 5' o, 3' o, d-SacI-s, d-XhoI-a, d-NheI-s, d-BglIII-a indicate primers used for vector construction and verification of transformants. *HPH*, hygromycin phosphotransferase–encoding gene; P<sub>trp</sub>, constitutive promoter; T<sub>trp</sub>, terminator; ORF, open reading frame. **(B)** Verification of the *cmr1* deletion mutants *cmr1-1* and *cmr1-2*. PCR reactions were performed with the following primers: 5' o and p<sub>trp</sub> (lane 1); 3' o and t<sub>trp</sub> (lane 2); s and a (lane 3). **(C)** Mating type segregation of the pigment-deficient hygromycin-resistant progeny of cross between  $\Delta$ *cmr1* and wild type. Numbers 1-6 indicate different progeny strains. **(D)** Verification of the  $\Delta$ *cmr1* x wild type progeny strains *cmr1-4*, 5, 6. The following primer pairs were used for PCR: 5' o and p<sub>trp</sub> (lane 1); 3' o and t<sub>trp</sub>e (lane 2); ctrl-s and V-a (lane 3).
